# Supplementary material for: Mutagenesis of Trichoderma reesei endoglucanase I: impact of expression host on activity and stability at elevated temperatures
Source: PubMed Central journal article supplement (PMC4347658; doi:10.1186/s12896-015-0118-z), 2015-02-21
Supplement: 12896_2015_118_MOESM1_ESM.pdf [file 12896_2015_118_MOESM1_ESM.pdf]

### Additional File 1

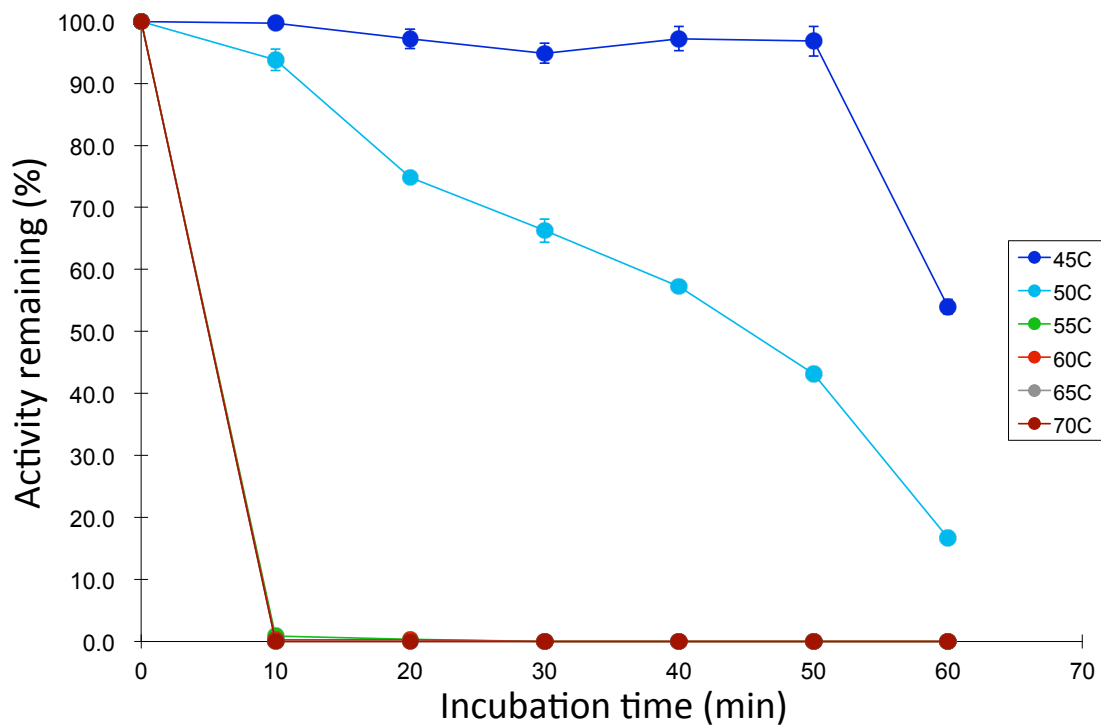

**Figure S1 Thermostability of cell-free expressed *Trichoderma reesei* endoglucanase I.** The cell-free expressed *T. reesei* EGI was incubated at various temperatures ranging from 45-70°C (legend) prior to measuring activity on CMC. Since the enzyme lost all activity upon incubation at or above 55°C for 10 min, the data points for incubations at 55°C, 60°C, 65°C and 70°C (for 0-60 min) overlap each other in Figure S1. Error bars represent one standard deviation for measurements.

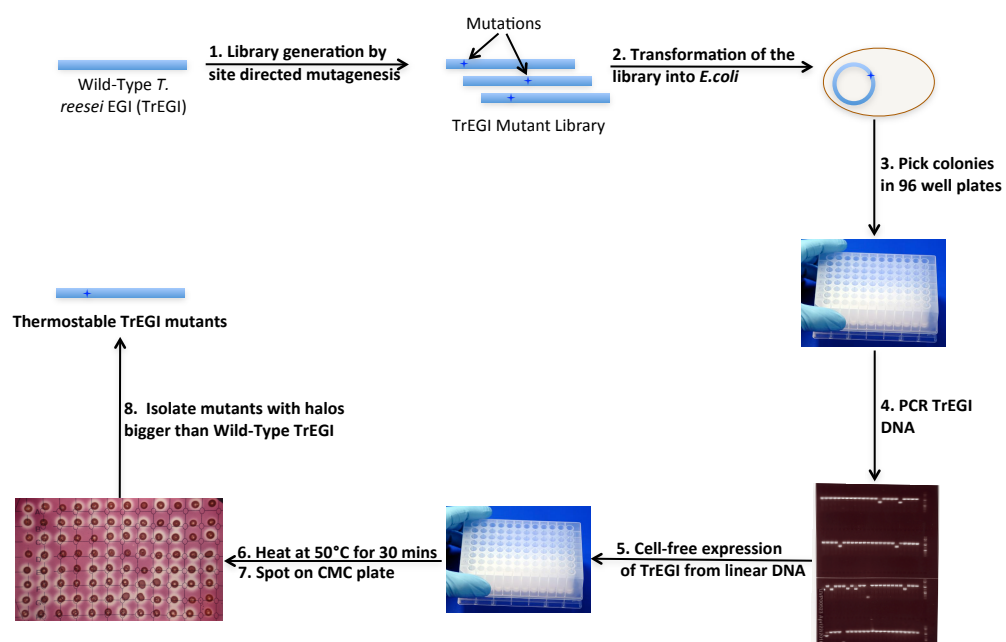

**Figure S2 Mutagenesis, screening, and selection of *Trichoderma reesei* endoglucanase I library.**

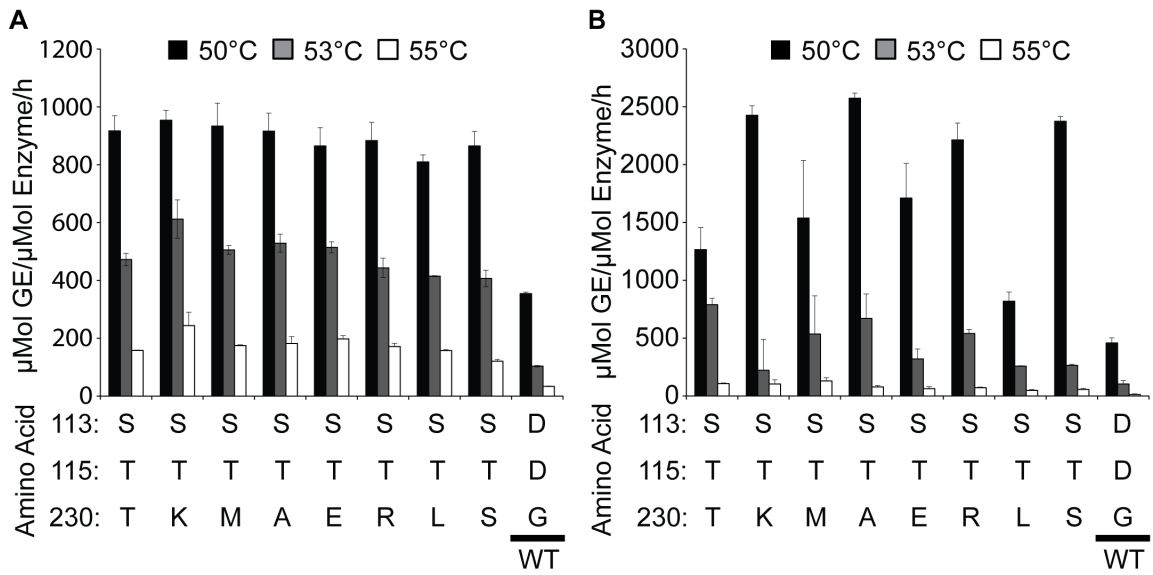

**Figure S3 Activity of cell-free expressed TrEGI enzymes on Avicel (A), and IL-Avicel (B).** Error bars represent one standard deviation for measurements.

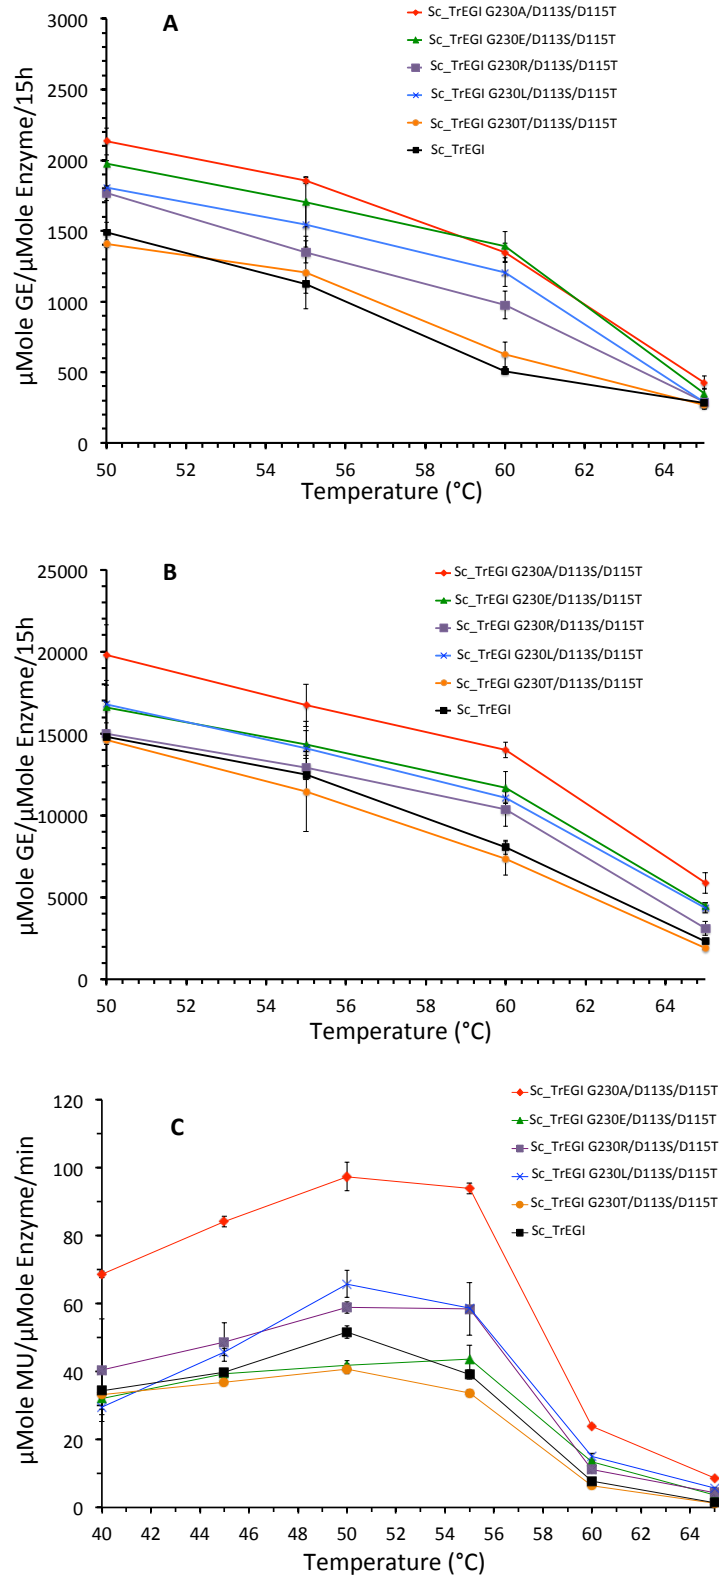

**Figure S4** Temperature-activity profiles of *T. reesei* EGI mutants expressed in *S. cerevisiae* on Avicel (A), IL-Avicel (B), & MU-cellobiose (C). Error bars represent one standard deviation for measurements.

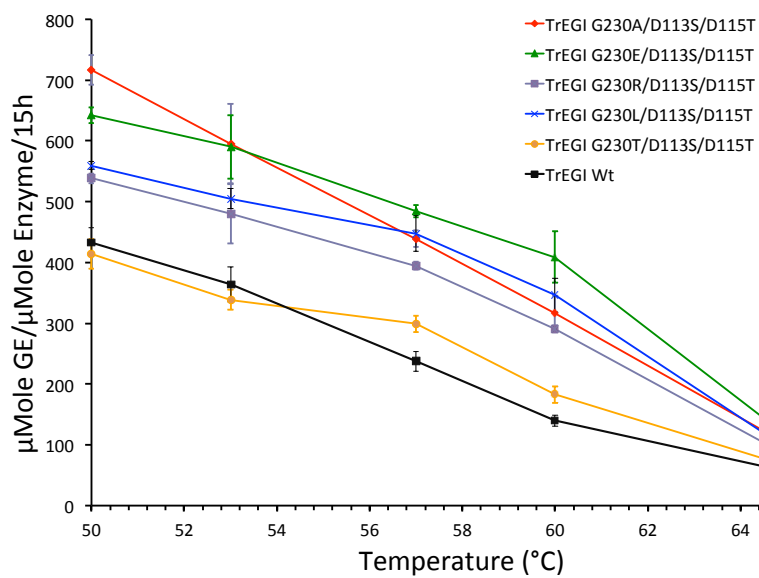

**Figure S5** Temperature-activity profiles on Avicel of *T. reesei* EGI mutants expressed in *S. cerevisiae* bearing a C-terminal His6 tag. Error bars represent one standard deviation for measurements.

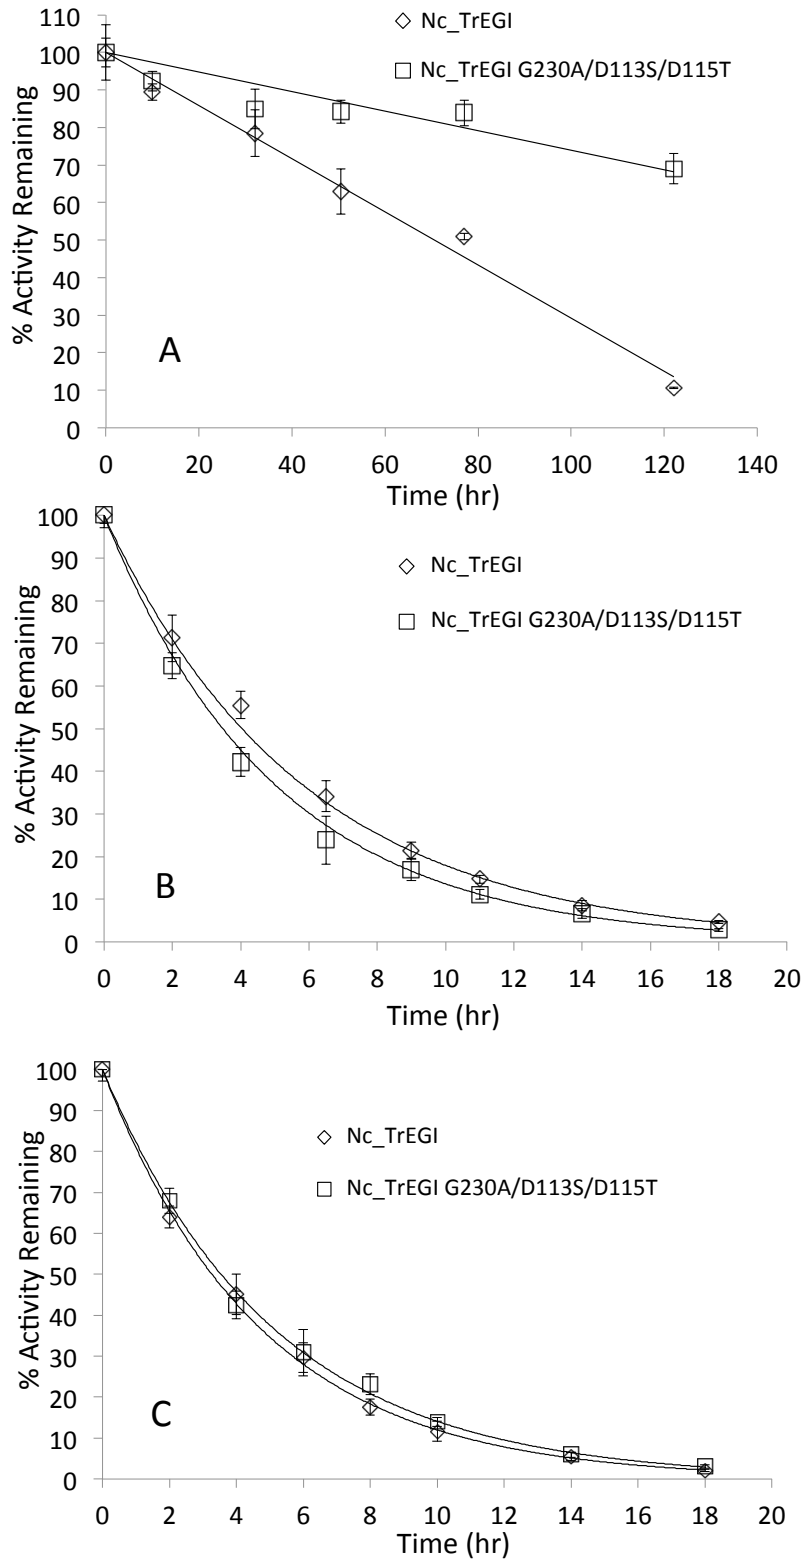

**Figure S6 Inactivation of Nc\_TrEGI G230A/D113S/D115T and Nc\_TrEGI measured at different temperatures: 60°C (A), 65°C (B), and 70°C (C). Error bars represent one standard deviation for measurements.**

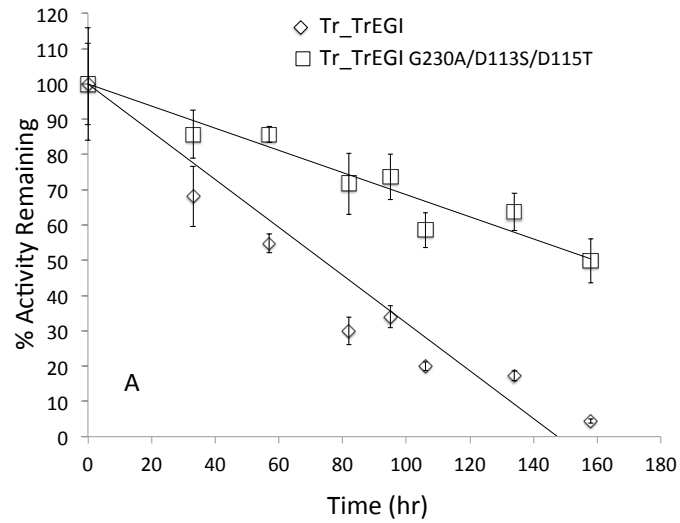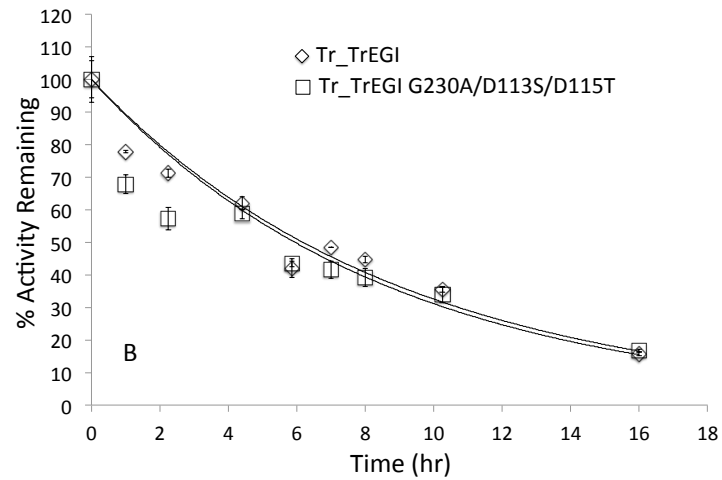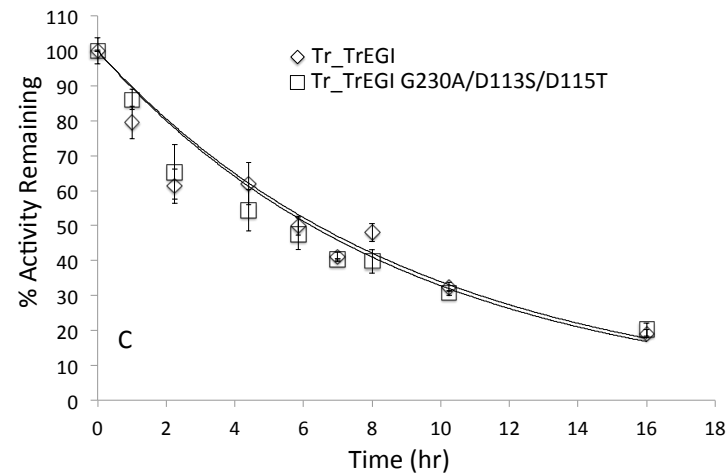

**Figure S7 Inactivation of Tr\_TrEGI G230A/D113S/D115T and Tr\_TrEGI measured at different temperatures: 60°C (A), 65°C (B), and 70°C (C). Error bars represent one standard deviation for measurements.**

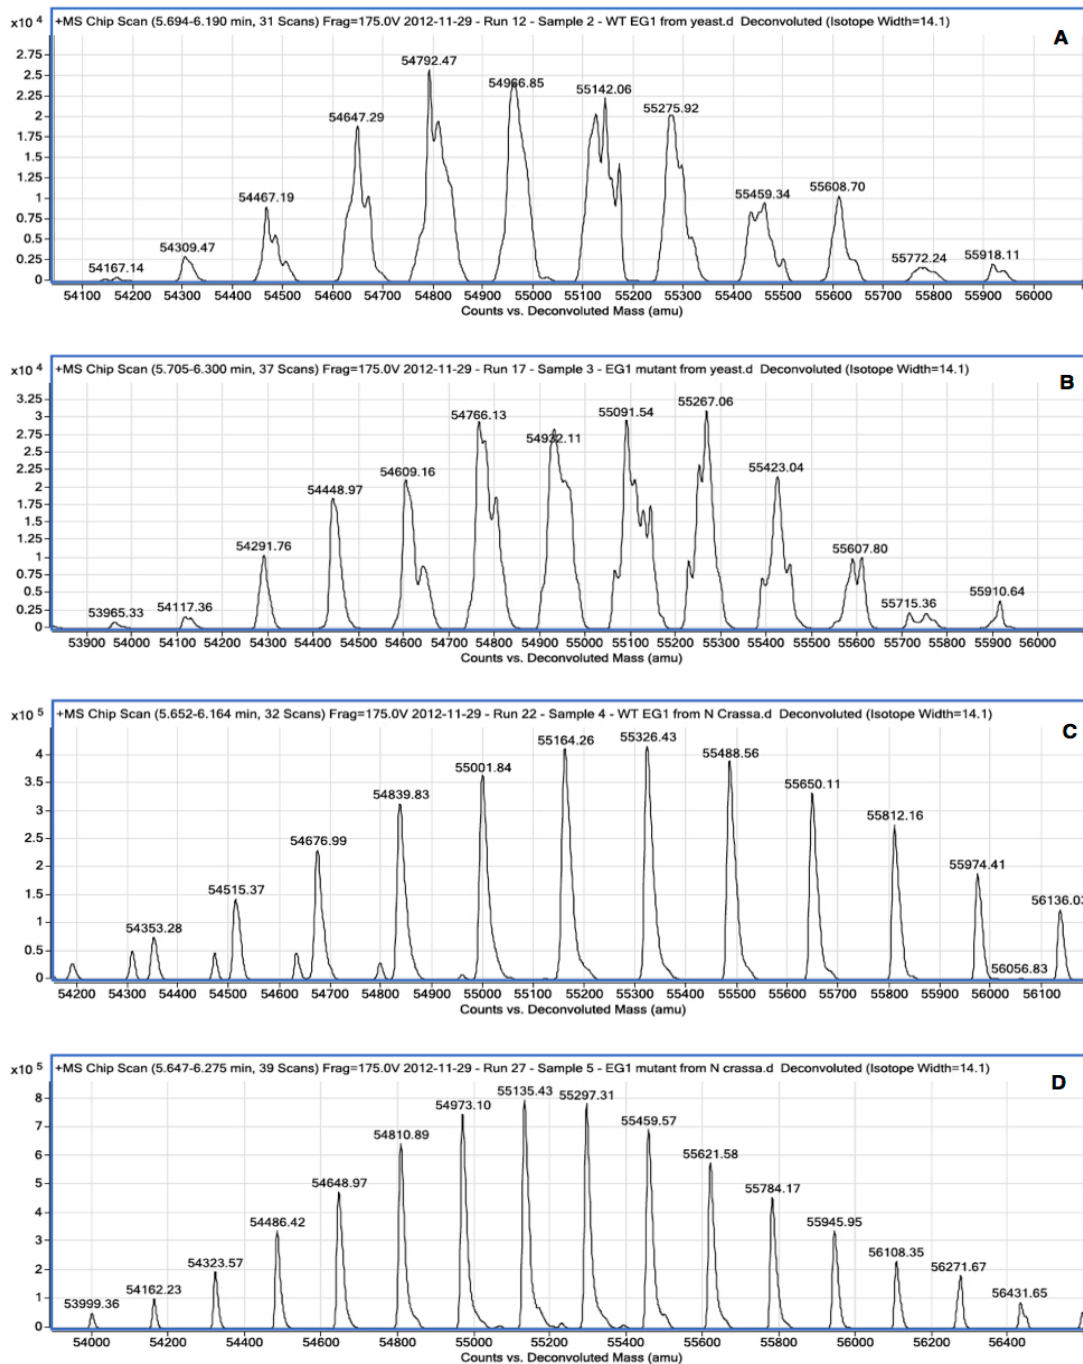

**Figure S8 Mass profiles for TrEGI wild-type (MW = 46.002 kDa) and mutant G230A/D113S/D115T (MW = 45.974 kDa) expressed in *S. cerevisiae* and *N. crassa*. MW was calculated from the amino acid sequence of the protein. **A**: MS of *Sc*\_TrEGI; **B**: MS of *Sc*\_TrEGI G230A/D113S/D115T; **C**: MS of *Nc*\_TrEGI; **D**: MS of *Nc*\_TrEGI G230A/D113S/D115T. *S. cerevisiae*-expressed TrEGI enzymes were treated**



with PNGase F prior to carrying out LC-MS. Each TrEGI protein exists as a series of glycoforms, with an average mass difference between each individual glycoform of ~162 Da, which corresponds to the MW of a single monosaccharide on the glycan. Comparing the mass of each individual glycoform for Nc\_TrEGI (Figure S8, C) with that of the corresponding G230A/D113S/D115T Nc\_TrEGI glycoform (Figure S8, D) reveals no appreciable mass difference (mass difference = 0-2 Da) after accounting for the 28 Da mass reduction due to the G230A/D113S/D115T mutation. For *S. cerevisiae*-expressed TrEGI enzymes, microheterogeneity was observed within glycoforms, rendering a precise mass comparison difficult. However, even with the microheterogeneity, observed mass differences between the most abundant glycoforms of Sc\_TrEGI (Figure S8, A) and G230A/D113S/D115T Sc\_TrEGI (Figure S8, B) range from 2-59 Da (after accounting for the mass change due to the G230A/D113S/D115T mutation), suggesting similar glycan content for these proteins.

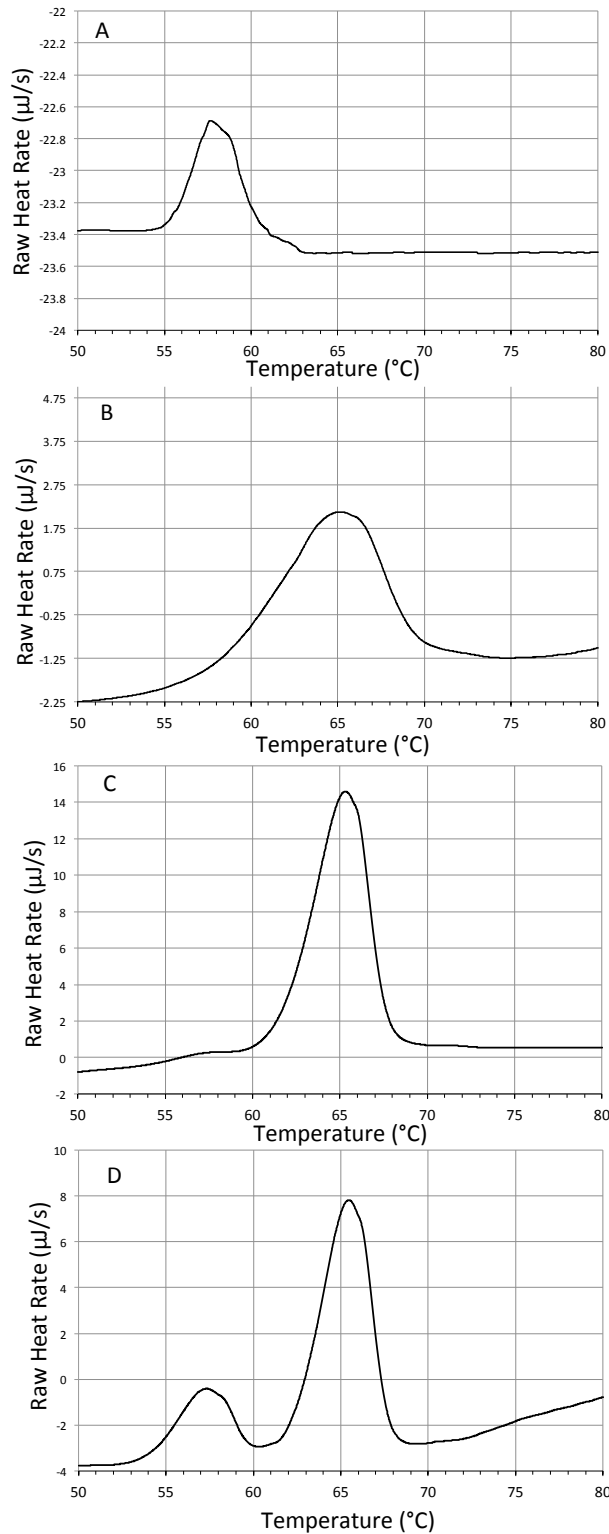

**Figure S9 Digital Scanning Calorimetry profiles for wild-type TrEGI expressed in *S. cerevisiae* and *T. reesei*. A: DSC of Sc\_TrEGI; B: DSC of Tr\_TrEGI; C: DSC of Sc\_TrEGI treated with glutaminyl cyclase; D: DSC of mixture of Sc\_TrEGI and Tr\_TrEGI.**

**Table S1 Biochemical characterization of TrEGI expressed in different hosts.** Specific activity was measured at 50°C against all substrates and is reported in  $\mu$ mole glucose equivalents per hour per  $\mu$ mole enzyme.  $T_m$  is the melting temperature for the enzyme. – (Not determined). Errors are reported in parentheses. Errors represent one standard deviation for measurements.

| <b>Expression Host</b>      | <b>Enzyme</b>                         | <b>CMC</b>      | <b>Avicel</b>   | <b>IL-Avicel</b> | <b>MU-Cellobiose</b> | <b><math>T_m</math><br/>(°C)</b> |
|-----------------------------|---------------------------------------|-----------------|-----------------|------------------|----------------------|----------------------------------|
| <i>E. coli</i> cell-extract | TrEGI                                 | 3312<br>(343)   | 23.6<br>(0.2)   | 305<br>(29)      | -                    | -                                |
| <i>E. coli</i> cell-extract | G230A/D113S/D115T TrEGI               | 12646<br>(128)  | 61.1<br>(4.2)   | 1716<br>(30)     | -                    | -                                |
| <i>E. coli</i> cell-extract | G230E/D113S/D115T TrEGI               | 10711<br>(1605) | 57.7<br>(4.2)   | 1140<br>(200)    | -                    | -                                |
| <i>S. cerevisiae</i>        | TrEGI                                 | -               | 99.2<br>(5)     | 986<br>(89)      | 3096<br>(108)        | 57                               |
| <i>S. cerevisiae</i>        | TrEGI treated with glutaminyl cyclase | -               | 148<br>(10)     | 1226<br>(95)     | 10084<br>(2609)      | 65                               |
| <i>S. cerevisiae</i>        | G230A/D113S/D115T TrEGI               | -               | 142.2<br>(6.3)  | 1319<br>(122)    | 5841<br>(106)        | 61                               |
| <i>S. cerevisiae</i>        | G230E/D113S/D115T TrEGI               | -               | 131.8<br>(1.3)  | 1105<br>(110)    | 1877<br>(59)         | 60                               |
| <i>N. crassa</i>            | TrEGI                                 | -               | 154.0<br>(4.3)  | 1295<br>(2)      | 12,972<br>(37)       | 65                               |
| <i>N. crassa</i>            | G230A/D113S/D115T TrEGI               | -               | 159.5<br>(14.3) | 1428<br>(113)    | 19,596<br>(1196)     | 68                               |
| <i>N. crassa</i>            | G230E/D113S/D115T TrEGI               | -               | 139.3<br>(5.5)  | 1185<br>(21)     | 6272<br>(318)        | 68                               |
| <i>T. reesei</i>            | TrEGI                                 | -               | 158<br>(40)     | 1368<br>(50)     | 13,913<br>(1947)     | 65                               |
| <i>T. reesei</i>            | G230A/D113S/D115T TrEGI               | -               | 167.8<br>(2.5)  | 1428<br>(91)     | 15,111<br>(2747)     | 68                               |

**Table S2 List of primers used for constructing the mutant TrEGI library.**

| Primer Name | Mutation Site | Sequence                                                                             |
|-------------|---------------|--------------------------------------------------------------------------------------|
| A-FWD       | A             | GGC GTC GAT ATT CCG TCC GCA NDT NDT<br>NDT NDT GAC ACC ATC TCT AGT TGC CCG<br>TCA GC |
| A-REV       | A             | GCT GAC GGG CAA CTA GAG ATG GTG TCA<br>HMA HMA HMA HMT GCG GAC GGA ATA TCG<br>ACG CC |
| B-FWD       | B             | TCA GCA TCG GCC TAC GGC NNK NNK GCA<br>ACC ATG GGC AAA GCT C                         |
| B-REV       | B             | GAG CTT TGC CCA TGG TTG CMN NMN NGC<br>CGT AGG CCG ATG CTG A                         |
| C-FWD       | C             | CGC GTC TGT ATC TGC TGN NKT CTN NKG<br>GCG AAT ACG TGA TGC TG                        |
| C-REV       | C             | CAG CAT CAC GTA TTC GCC MNN AGA MNN<br>CAG CAG ATA CAG ACG CG                        |
| D-FWD       | D             | CAA ATC CTA TTA CNN KCC GGG TGA TAC C                                                |
| D-REV       | D             | GGT ATC ACC CGG MNN GTA ATA GGA TTT G                                                |
| E-FWD       | E             | GTT TCA ACC CGT ATN NKA GTG GTT ACA<br>AAT C                                         |
| E-REV       | E             | GAT TTG TAA CCA CTM NNA TAC GGG TTG<br>AAA C                                         |
| F-FWD       | F             | CAA TTT GGA ACG ATN NKT CGC AGT ATA TG                                               |
| F-REV       | F             | CAT ATA CTG CGA MNN ATC GTT CCA AAT TG                                               |
| G-FWD       | G             | GAC ACC ATC TCT NNK TGC CCG TCA G                                                    |
| G-REV       | G             | CTG ACG GGC AMN NAG AGA TGG TGT C                                                    |
| T7-FWD      | Universal FWD | TCG ATC CCG CGA AAT TAA TAC GAC TCA CTA<br>TAG GG                                    |
| T7-REV      | Universal REV | CAA AAA ACC CCT CAA GAC CCG TTT AG                                                   |
